# Supplementary material for: Gene identification for risk of relapse in stage I lung adenocarcinoma patients: a combined methodology of gene expression profiling and computational gene network analysis
Source: PubMed Central journal article supplement (PMC5058701; doi:10.18632/oncotarget.8723), 2016-04-13
Supplement: oncotarget-07-30561-s001.pdf [file oncotarget-07-30561-s001.pdf]

## Gene identification for risk of relapse in stage I lung adenocarcinoma patients: a combined methodology of gene expression profiling and computational gene network analysis

### SUPPLEMENTARY TABLES

Supplementary Table S1: Increased genes

| RefSeq Transcript ID                      | Gene Title                                                                        | Gene Symbol | NR vs NL          | ER vs NL           | ER vs NR           |
|-------------------------------------------|-----------------------------------------------------------------------------------|-------------|-------------------|--------------------|--------------------|
| NM_004102                                 | Fatty acid binding protein 3, muscle and heart                                    | FABP3       | -2,54838          | 12,9746            | 33,0641            |
| NM_002195                                 | insulin-like 4 (placenta)                                                         | INSL4       | 14,2474           | 298,881            | 20,9779            |
| NM_145016                                 | glycine-N-acyltransferase-like 2                                                  | GLYATL2     | 1,02613           | 15,1925            | 14,8056            |
| NM_006536                                 | CLCA family member 2, chloride channel regulator                                  | CLCA2       | -1,31477          | 10,8036            | 14,2042            |
| NM_003856<br>NM_016232                    | interleukin 1 receptor-like 1                                                     | IL1RL1      | -28,9963          | -2,53838           | 11,4231            |
| NR_002196                                 | H19, imprinted maternally expressed transcript (non-protein coding)               | H19         | 1,03511           | 12,2745            | 11,8582            |
| NM_020299                                 | aldo-keto reductase family 1, member B10 (aldose reductase)                       | AKR1B10     | 20,8573           | 231,874            | 11,1171            |
| NM_031422                                 | carbohydrate (N-acetylgalactosamine 4-0) sulfotransferase 9                       | CHST9       | -9,34989          | 1,69468            | 5,51721            |
| NM_001807                                 | carboxyl ester lipase (bile salt-stimulated lipase)                               | CEL         | 1,12253<br>1,7046 | 7,97614<br>11,2865 | 7,10552<br>6,62119 |
| NM_182700<br>NM_198956<br>NR_024112       | Sp8 transcription factor                                                          | SP8         | 1,12714           | 8,11128            | 7,19635            |
| NM_002214                                 | integrin, beta 8                                                                  | ITGB8       | 1,0153            | 6,13108            | 6,03867            |
| NM_001216                                 | carbonic anhydrase IX                                                             | CA9         | 2,0413            | 12,3794            | 6,06449            |
| NM_018951<br>NM_153715                    | homeobox A10                                                                      | HOXA10      | 1,13382           | 6,49194            | 5,72571            |
| NM_020692                                 | UDP-N-acetyl-alpha-D-galactosamine:polypeptide N-acetylgalactosaminyltransferase  | GALNTL1     | -1,3463           | 4,22623            | 5,68979            |
| NM_002704                                 | pro-platelet basic protein (chemokine (C-X-C motif) ligand 7)                     | PPBP        | -36,9476          | -6,8792            | 5,37092            |
| NM_005045<br>NM_173054                    | Reelin                                                                            | RELN        | -1,41962          | 3,6411             | 5,16898            |
| NM_000963                                 | prostaglandin-endoperoxide synthase 2 (prostaglandin G/H synthase and cyclooxyge) | PTGS2       | -2,06279          | 2,45773            | 5,06977            |
| NM_001122633<br>NM_001122634<br>NM_001875 | carbamoyl-phosphate synthetase 1, mitochondrial                                   | CPS1        | 58,8098           | 214,566            | 3,64848            |
| NM_006528                                 | tissue factor pathway inhibitor 2                                                 | TFPI2       | 1,97356           | 9,83974            | 4,98578            |
| NM_001103149<br>NM_018215                 | PNMA-like 1                                                                       | PNMAL1      | -1,54819          | 4,71708            | 7,30293            |

**Supplementary Table S2: Decreased genes**

See Supplementary File 1

**Supplementary Table S3: Discriminant network score for increased and decreased genes**

| <b>Genes increased</b> | <b>Discriminant network score</b> |
|------------------------|-----------------------------------|
| <b>FABP3</b>           | <b>0.70707</b>                    |
| CLCA2                  | 0.61527                           |
| HOXA10                 | 0.60134                           |
| AKR1B10                | 0.56628                           |
| <b>Genes decreased</b> | <b>Discriminant network score</b> |
| <b>SCGB1A1</b>         | <b>0.58448</b>                    |
| PRSS1                  | 0.56116                           |
| PSCA                   | 0.54840                           |
| PGC                    | 0.52750                           |
| TFF1                   | 0.51642                           |
| SPRR1B                 | 0.51398                           |
